# Supplementary material for: Crystal structures and properties of solvent-free LiYb(BH4)4−xClx, Yb(BH4)3 and Yb(BH4)2−xClx
Source: Royal Society of Chemistry journal article supplement (doi:10.1039/c3ra40435h), 2013-01-01
Supplement: c3ra40435h.pdf [file c3ra40435h.pdf]

## Supporting Information

# Crystal structures and properties of solvent-free $\text{LiYb}(\text{BH}_4)_{4-x}\text{Cl}_x$ , $\text{Yb}(\text{BH}_4)_3$ and $\text{Yb}(\text{BH}_4)_{2-x}\text{Cl}_x$

*Jørn Eirik Olsen, Christoph Frommen, Magnus H. Sørby, Bjørn C. Hauback<sup>†</sup>*

Institute for Energy Technology, Physics Department, P.O. Box 40, NO-2027 Kjeller,  
Norway

---

<sup>†</sup> Corresponding author. E-mail: [bjorn.hauback@ife.no](mailto:bjorn.hauback@ife.no), Phone: +47 63 80 60 78, Fax :  
+47 63 80 63 88

**Table S1.** Comparison between experimental Raman spectra of  $\text{LiYb}(\text{BH}_4)_{4-x}\text{Cl}_x$  and  $\text{LiSc}(\text{BH}_4)_4$ .

| Raman Sc <sup>a</sup> (cm <sup>-1</sup> ) | Raman Yb <sup>b</sup> (cm <sup>-1</sup> ) | $\Delta$ |
|-------------------------------------------|-------------------------------------------|----------|
| 216                                       | 199                                       | 17       |
| 231                                       | 215                                       | 16       |
| 474                                       | 455                                       | 19       |
| 1079                                      | 1085                                      | -6       |
| 1112                                      | 1112                                      | 0        |
|                                           | 1217                                      |          |
| 1247                                      | 1251                                      | -4       |
| 1325                                      | 1331                                      | -6       |
|                                           | 1368                                      |          |
|                                           | 2140                                      |          |
| 2211                                      | 2205                                      | 6        |
| 2264                                      | 2259                                      | 5        |
|                                           | 2432                                      |          |
| 2483                                      | 2482                                      | 1        |

<sup>a</sup> Hagemann, H.; Longhini, M.; Kaminski, J. W.; Wesolowski, T. A.; Cerny, R.; Penin, N.; Sørby, M. H.; Hauback, B. C.; Severa, G.; Jensen, C. M. *J. Phys. Chem. A* **2008**, *112*, 7551-7555.

<sup>b</sup>From the table it seems to be some additional peaks for  $\text{LiYb}(\text{BH}_4)_{4-x}\text{Cl}_x$ , however visually inspection of the reported Raman spectra for  $\text{LiSc}(\text{BH}_4)_4$  indicates weak peaks corresponding to the peaks at 1217, 2140 and 2432 cm<sup>-1</sup> reported here.

**Table S2.** Comparison between experimental Raman spectra of tet-Yb(BH<sub>4</sub>)<sub>2-x</sub>Cl<sub>x</sub> and β-Ca(BH<sub>4</sub>)<sub>2</sub>

| Raman Ca <sup>a</sup> (cm <sup>-1</sup> ) | Raman Yb (cm <sup>-1</sup> ) | Δ   |
|-------------------------------------------|------------------------------|-----|
| 2355                                      | 2364                         | -9  |
| 2296                                      | 2286                         | -10 |
| 1309                                      | 1312                         | -3  |
| 1250                                      | 1255                         | -5  |
| 1078                                      | 1087                         | -9  |

<sup>a</sup> Reed, D.; Book, D. *Curr. Opin. Solid State Mat. Sci.* **2011**, *15*, 62-72.

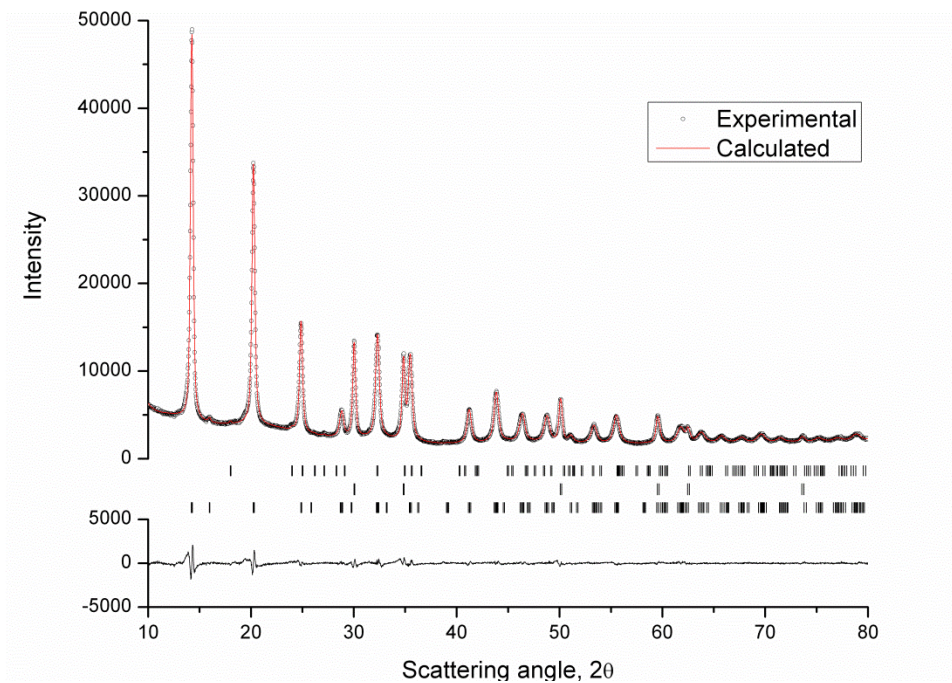

**Figure S1.** The Rietveld refinement for  $\text{LiYb}(\text{BH}_4)_{3.0}\text{Cl}_{1.0}$ . showing the experimental data as circles, the calculated diffraction pattern as a solid line, tick marks for  $\text{LiBH}_4$  (top),  $\text{LiCl}$  (middle) and  $\text{LiYb}(\text{BH}_4)_{3.0}\text{Cl}_{1.0}$  (bottom), respectively, and the difference plot,  $\lambda = 1.5418 \text{ \AA}$ .

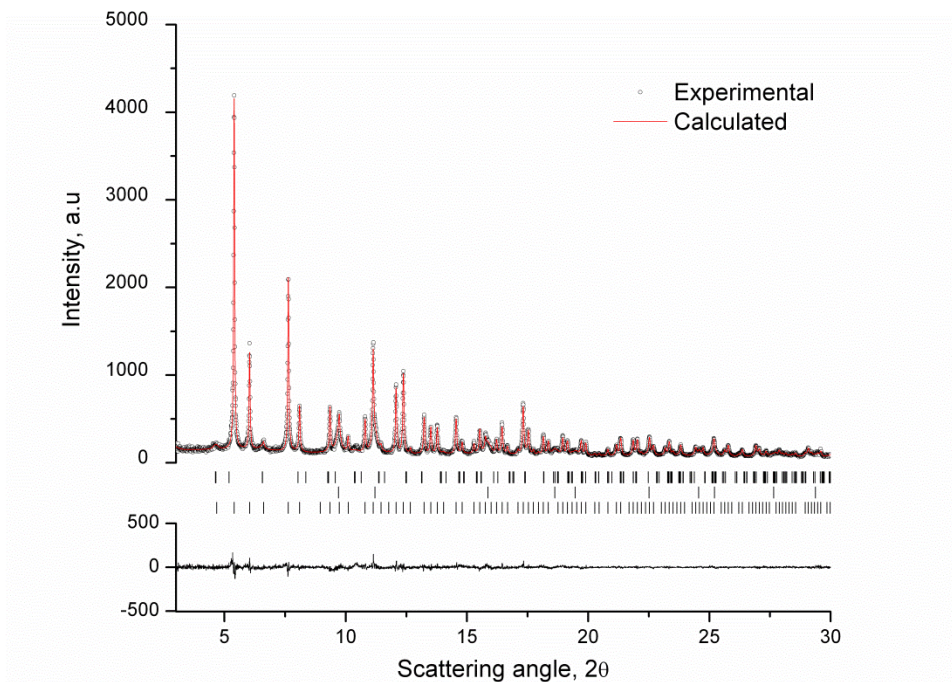

**Figure S2.** The Rietveld refinement for  $\alpha$ -Yb(BH<sub>4</sub>)<sub>3</sub>, showing the experimental data as circles, the calculated diffraction pattern as a solid line, tick marks for LiYb(BH<sub>4</sub>)<sub>3.0</sub>Cl<sub>1.0</sub> (top), LiCl (middle) and  $\alpha$ -Yb(BH<sub>4</sub>)<sub>3</sub> (bottom), respectively, and the difference plot,  $\lambda = 0.503208 \text{ \AA}$ .

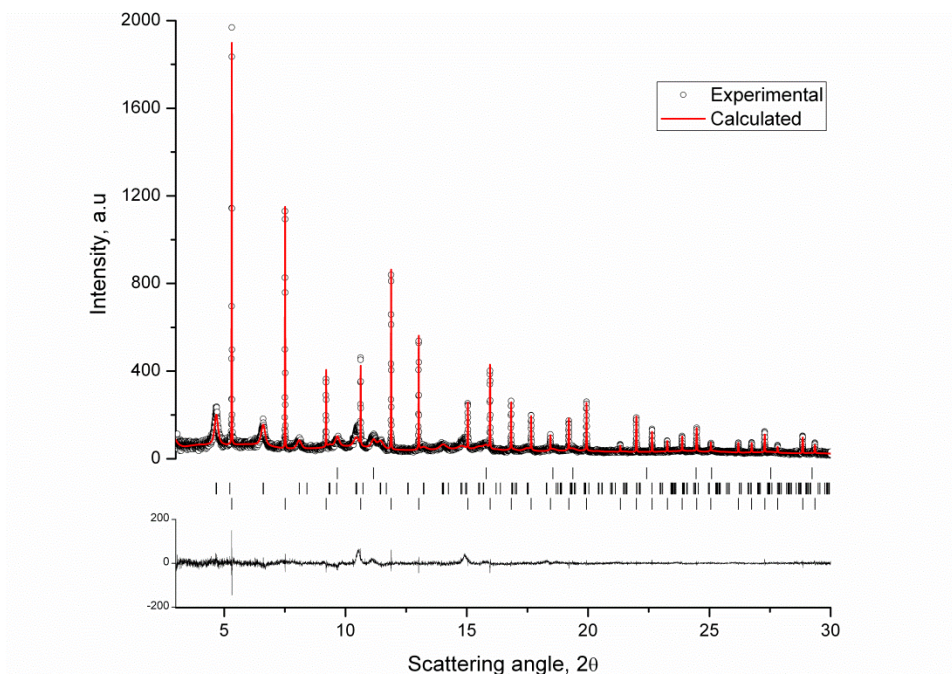

**Figure S3.** The Rietveld refinement for  $\beta$ -Yb(BH<sub>4</sub>)<sub>3</sub>, showing the experimental data as circles, the calculated diffraction pattern as a solid line, tick marks for LiCl(top), LiYb(BH<sub>4</sub>)<sub>3.0</sub>Cl<sub>1.0</sub>(middle) and  $\beta$ -Yb(BH<sub>4</sub>)<sub>3</sub>(bottom), respectively, and the difference plot,  $\lambda = 0.503208 \text{ \AA}$ .

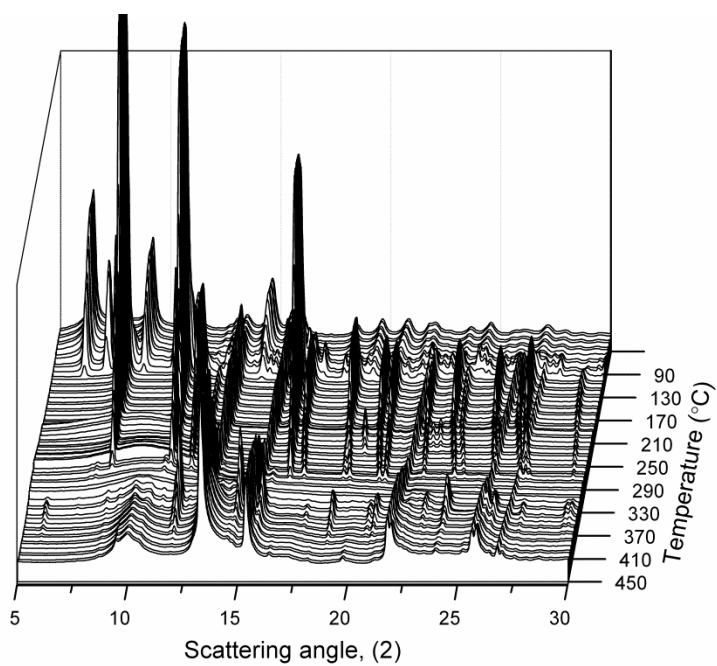

**Figure S4.** In-situ SR-PXD data collected for  $\text{LiYb}(\text{BH}_4)_{3.0}\text{Cl}_{1.0}$ ,  $\lambda = 0.70947 \text{ \AA}$

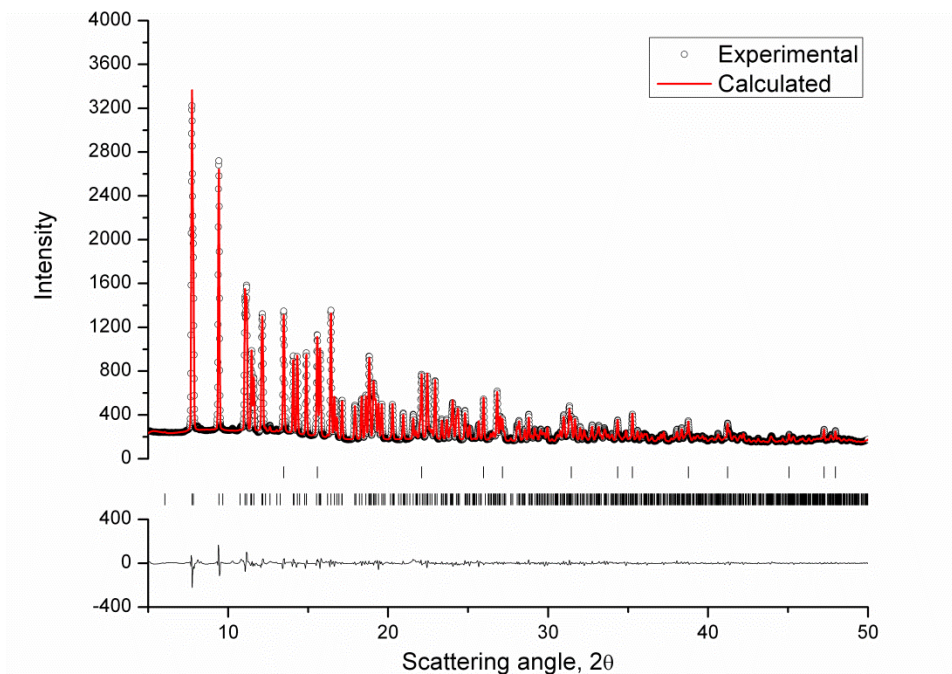

**Figure S5.** The Rietveld refinement for *ortho*-Yb(BH<sub>4</sub>)<sub>1.7</sub>Cl<sub>0.3</sub>, showing the experimental data as circles, the calculated diffraction pattern as a solid line, tick marks for LiCl(top) and *ortho*-Yb(BH<sub>4</sub>)<sub>1.7</sub>Cl<sub>0.3</sub>(bottom), respectively, and the difference plot,  $\lambda = 0.69660 \text{ \AA}$ .

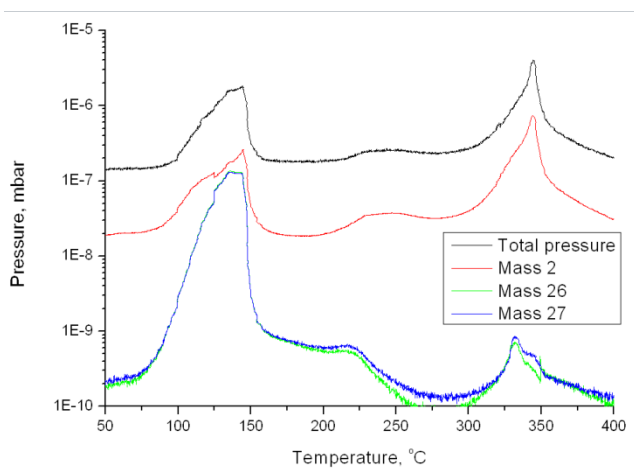

**Figure S6.** TPD-data collected from a LiYb(BH<sub>4</sub>)<sub>3.0</sub>Cl<sub>1.0</sub> sample.
